# Supplementary material
Source: publisher site journal article supplement (https://www.dovepress.com/article/498088)
Supplement: Supplementary file 1 [file get_supplementary_file.php]

**Supplementary Data**

**COPD Exacerbations, Air Pollutant Fluctuations, and Individual-Level Factors in the Pandemic Era**

Sahar Mikaeeli, Dany Doiron, Jean Bourbeau, Pei Zhi Li, Shawn D. Aaron, Kenneth Chapman, Paul Hernandez, François Maltais, Darcy Marciniuk, Denis E. O'Donnell, Don D. Sin, Brandie L. Walker, Wan Tan, Simon Rousseau, and Bryan A. Ross*, for the CanCOLD Collaborative Research Group and the Canadian Respiratory Research Network.

**Methods**

***Population and study periods***

Data from Canadian Cohort Obstructive Lung Disease (CanCOLD), a prospective longitudinal cohort study in nine Canadian cities across 6 provinces, were utilized. Comprehensive demographic information including smoking history and self-reported co-morbid disease status, detailed clinical test results including gold-standard diagnostic spirometry1, 2 and bloodwork (including peripheral blood eosinophil count), and prospectively collected self-reported exacerbations were available from study participants.

***Air pollution exposure and covariates***

Concentrations of NO2, PM2.5 and O3 from fixed monitoring stations were aggregated from the *National Air Pollution Surveillance* (NAPS) database into city-level daily estimates, as reported previously.3 The sum of NO2 and O3 yielded Ox estimates.4, 5 Mean temperature and relative humidity (weather covariates) were acquired from the *Applied Climatology Services/Meteorological Service of Canada*, generating city-level averages.

***Additional pandemic-specific covariates***

From May 2020 onwards, a monthly ‘COVID-19 Questionnaire’ was administered to collect relevant behaviors, symptoms, and events directly or indirectly related to the COVID-19 pandemic. Instances of contracting the virus, time spent outdoors, regional quarantine and travel status, and individual-level steps taken to reduce the risk of transmission, were obtained through the COVID-19 Questionnaire (see **Figure S1**). A modified InFLUenza Patient-Reported Outcome (FLU-PRO) questionnaire6 was included within the COVID-19 Questionnaire with a mean-based scoring algorithm, computing means across 17 symptoms and their severity with a score of 1 signifying mild flu symptoms and ≥1 indicating escalating severity.

***Statistical analysis***

During both the pre-pandemic and COVID-19 pandemic periods, city-specific air pollutant concentrations were presented as medians with interquartile range (IQR). Differences between the two study periods were compared using generalized estimating equations (GEE) with normal distribution. Models were adjusted for season, and for temperature and humidity (restricted cubic splines, with knots at 25th, 50th, and 75th percentiles), which allowed for a flexible representation of these nonlinear relationships within each model. Differences in symptom-based and event-based exacerbation rates between the two study periods were compared using GEE models with negative binomial distribution. Models accounted for repeated measures (individual participant exacerbation clusters) and were unadjusted as well as adjusted (for age and gender, as well as for season and for temperature and humidity spline terms).

The association between air pollutant concentrations and exacerbation rates across both study periods were estimated by fitting GEE models, first adjusted only for period and secondly adjusted for period, age, gender, season, and temperature and humidity (spline terms). These two sets of models were then fitted within each of the two distinct study periods. Offset was used to account for differing period follow-up durations.

Given potential confounding factors characteristic of the COVID-19 pandemic period, sensitivity analyses were conducted in the subgroup of participants with COVID-19 Questionnaire responses available to estimate the association between behavioral ‘protective’ measures and markers of viral infection status with exacerbations. Confounding variables were inserted into COVID-19 pandemic period models to retest the associations between each air pollutant and exacerbation rates within this period.

Finally, the determination of relevant individual-level susceptibilities (risk factors) across air pollutant-exacerbation relationships was investigated using multivariable analyses with a stepwise approach. All variables in univariable (adjusted only for period) analyses with P<0.05 were considered in the multivariable model (adjusted for period, season, and temperature and humidity spline terms). Subgroup differences by self-reported gender (female/male), co-morbid asthma status (present/absent), and blood eosinophil count (Eos: <300/≥300 counts/microliter, as well as <3%/≥3%) were analyzed separately, with the use of the Wald test to assess for effect modification.

Exchangeable correlation structure was used for all GEE models. Results are presented as point estimates, or as rate ratios (RRs), as appropriate, with 95% confidence intervals (95% CIs). Adjustments for multiple comparisons were not made. All statistical analyses were conducted using SAS statistical software, version 9.4 (SAS Institute, Cary, North Carolina, USA).

References:

1. *Global strategy for the diagnosis, management, and prevention of COPD (2024 report)*. 2024. <https://goldcopd.org/2024-gold-report/>

2. Bourbeau J, Bhutani M, Hernandez P, et al. 2023 Canadian thoracic society guideline on pharmacotherapy in patients with stable COPD. *Chest*. Nov 2023;164(5):1159-1183. doi:10.1016/j.chest.2023.08.014

3. Ross BA, Doiron D, Benedetti A, et al. Short-term air pollution exposure and exacerbation events in mild to moderate COPD: a case-crossover study within the CanCOLD cohort. *Thorax*. Oct 2023;78(10):974-982. doi:10.1136/thorax-2022-219619

4. Hoffmann C, Maglakelidze M, von Schneidemesser E, Witt C, Hoffmann P, Butler T. Asthma and COPD exacerbation in relation to outdoor air pollution in the metropolitan area of Berlin, Germany. *Respir Res*. Mar 20 2022;23(1):64. doi:10.1186/s12931-022-01983-1

5. Brancher M. Increased ozone pollution alongside reduced nitrogen dioxide concentrations during Vienna's first COVID-19 lockdown: significance for air quality management. *Environ Pollut*. Sep 1 2021;284:117153. doi:10.1016/j.envpol.2021.117153

6. Powers JH, 3rd, Bacci ED, Guerrero ML, et al. Reliability, validity, and responsiveness of InFLUenza patient-reported outcome (FLU-PRO(c)) scores in influenza-positive patients. *Value Health*. Feb 2018;21(2):210-218. doi:10.1016/j.jval.2017.04.014

|  | Univariable analysis | | | |
| --- | --- | --- | --- | --- |
|  | Symptom-based exacerbations | | Event-based exacerbations | |
|  | Adj. RR (95% CI) | P-values | Adj. RR (95% CI) | P-values |
| Gender, female vs. male | 1.39 (1.15, 1.68) | <0.001* | 1.71 (1.33, 2.20) | <0.001* |
| Age, per 1-year increase | 0.99 (0.98, 1.00) | 0.053 | 1.00 (0.98, 1.01) | 0.543 |
| BMI, per 1-unit increase | 1.01 (1.00, 1.03) | 0.119 | 1.02 (1.00, 1.05) | 0.063 |
| Pack-years, per 1-unit increase | 1.01 (1.00, 1.01) | <0.001* | 1.01 (1.01, 1.02) | <0.001* |
| Biomass exposure 10 years | 1.17 (0.90, 1.52) | 0.239 | 1.20 (0.85, 1.69) | 0.300 |
| Asthma, yes vs. no | 2.14 (1.79, 2.56) | <0.001* | 2.70 (2.12, 3.43) | <0.001* |
| Eos counts |  |  |  |  |
| <300 Eos/microliter | REF | - | REF | - |
| ≥300 Eos count/microliter | 1.19 (0.96, 1.48) | 0.111 | 1.40 (1.06, 1.85) | 0.019* |
| Eos percentage |  |  |  |  |
| <3% | REF | - | REF | - |
| ≥3% | 1.33 (1.06, 1.66) | 0.013* | 1.61 (1.20, 2.15) | 0.002* |
| FEV1, % predicted, per 5% increase | 0.90 (0.88, 0.93) | <0.001* | 0.86 (0.84, 0.89) | <0.001* |
| NO2,per IQR increase (ppb) | 1.33 (1.20, 1.48) | <0.001* | 1.21 (1.07, 1.37) | 0.002* |
| PM2.5, per IQR increase (g/m3) | 1.01 (0.91, 1.12) | 0.839 | 1.06 (0.93, 1.22) | 0.381 |
| O3,per IQR increase (ppb) | 0.96 (0.87, 1.06) | 0.418 | 0.99 (0.88, 1.12) | 0.914 |
| Ox, per IQR increase (ppb) | 1.23 (1.10, 1.37) | <0.001* | 1.16 (1.01, 1.35) | 0.039* |

**Table S1:** Associations Between Individual-Level Factors and Exacerbation Rates

**Note:** Univariable analysis, adjusted only for period.

**Abbreviations:** BMI, body mass index; Eos, eosinophil; FEV1, forced expiratory volume in one second; NO2, nitrogen dioxide; PM2.5, fine particulate matter; O3, ozone; Ox, total oxidant; IQR, interquartile range; Adj, Adjusted; CI, confidence interval; RR, rate ratio; ppb, parts per billion; g, microgram; m3, meter cubed. Symbols: %, percent; *, P<0.05.

**Figure S1.** CanCOLD telephone interview COVID-19 Questionnaire.

**
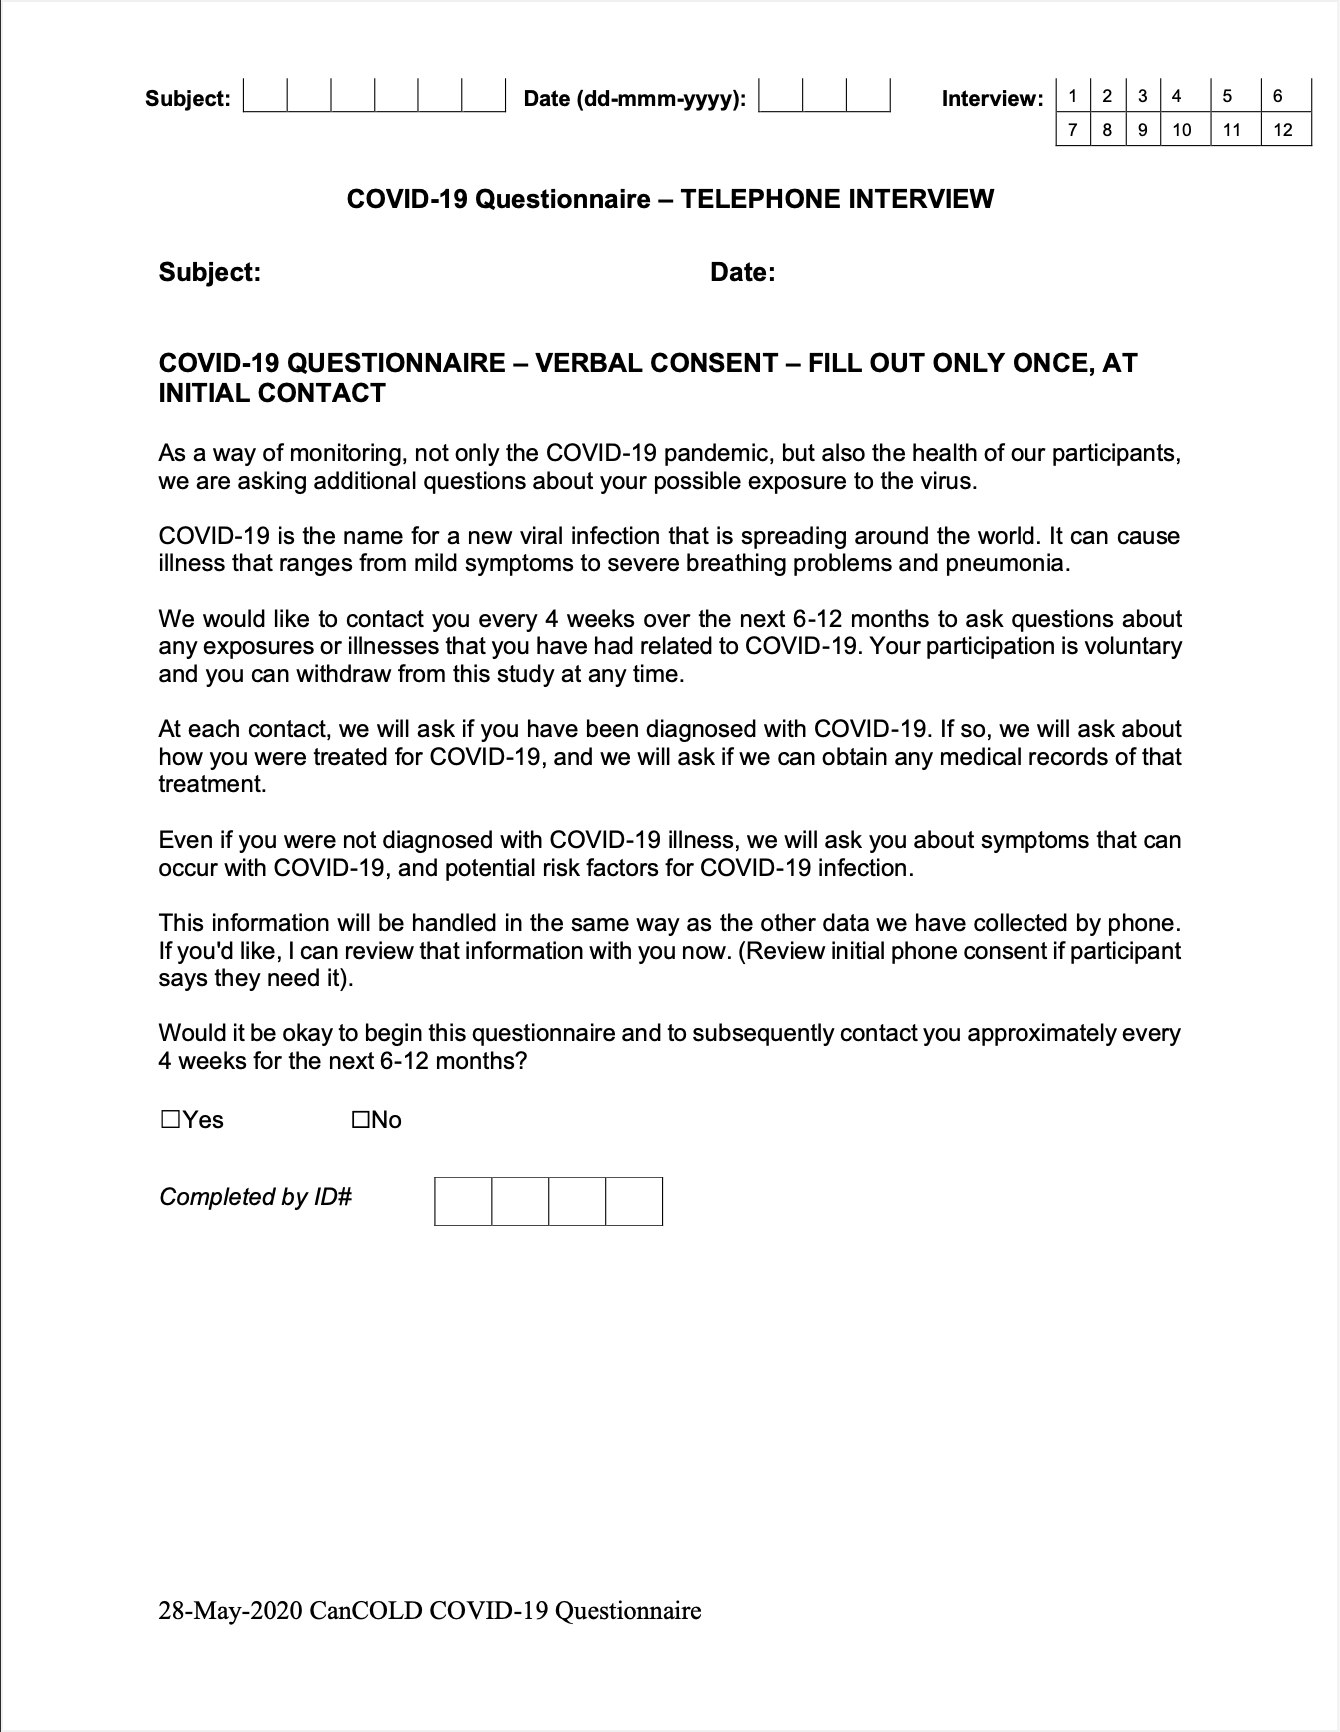
**

**
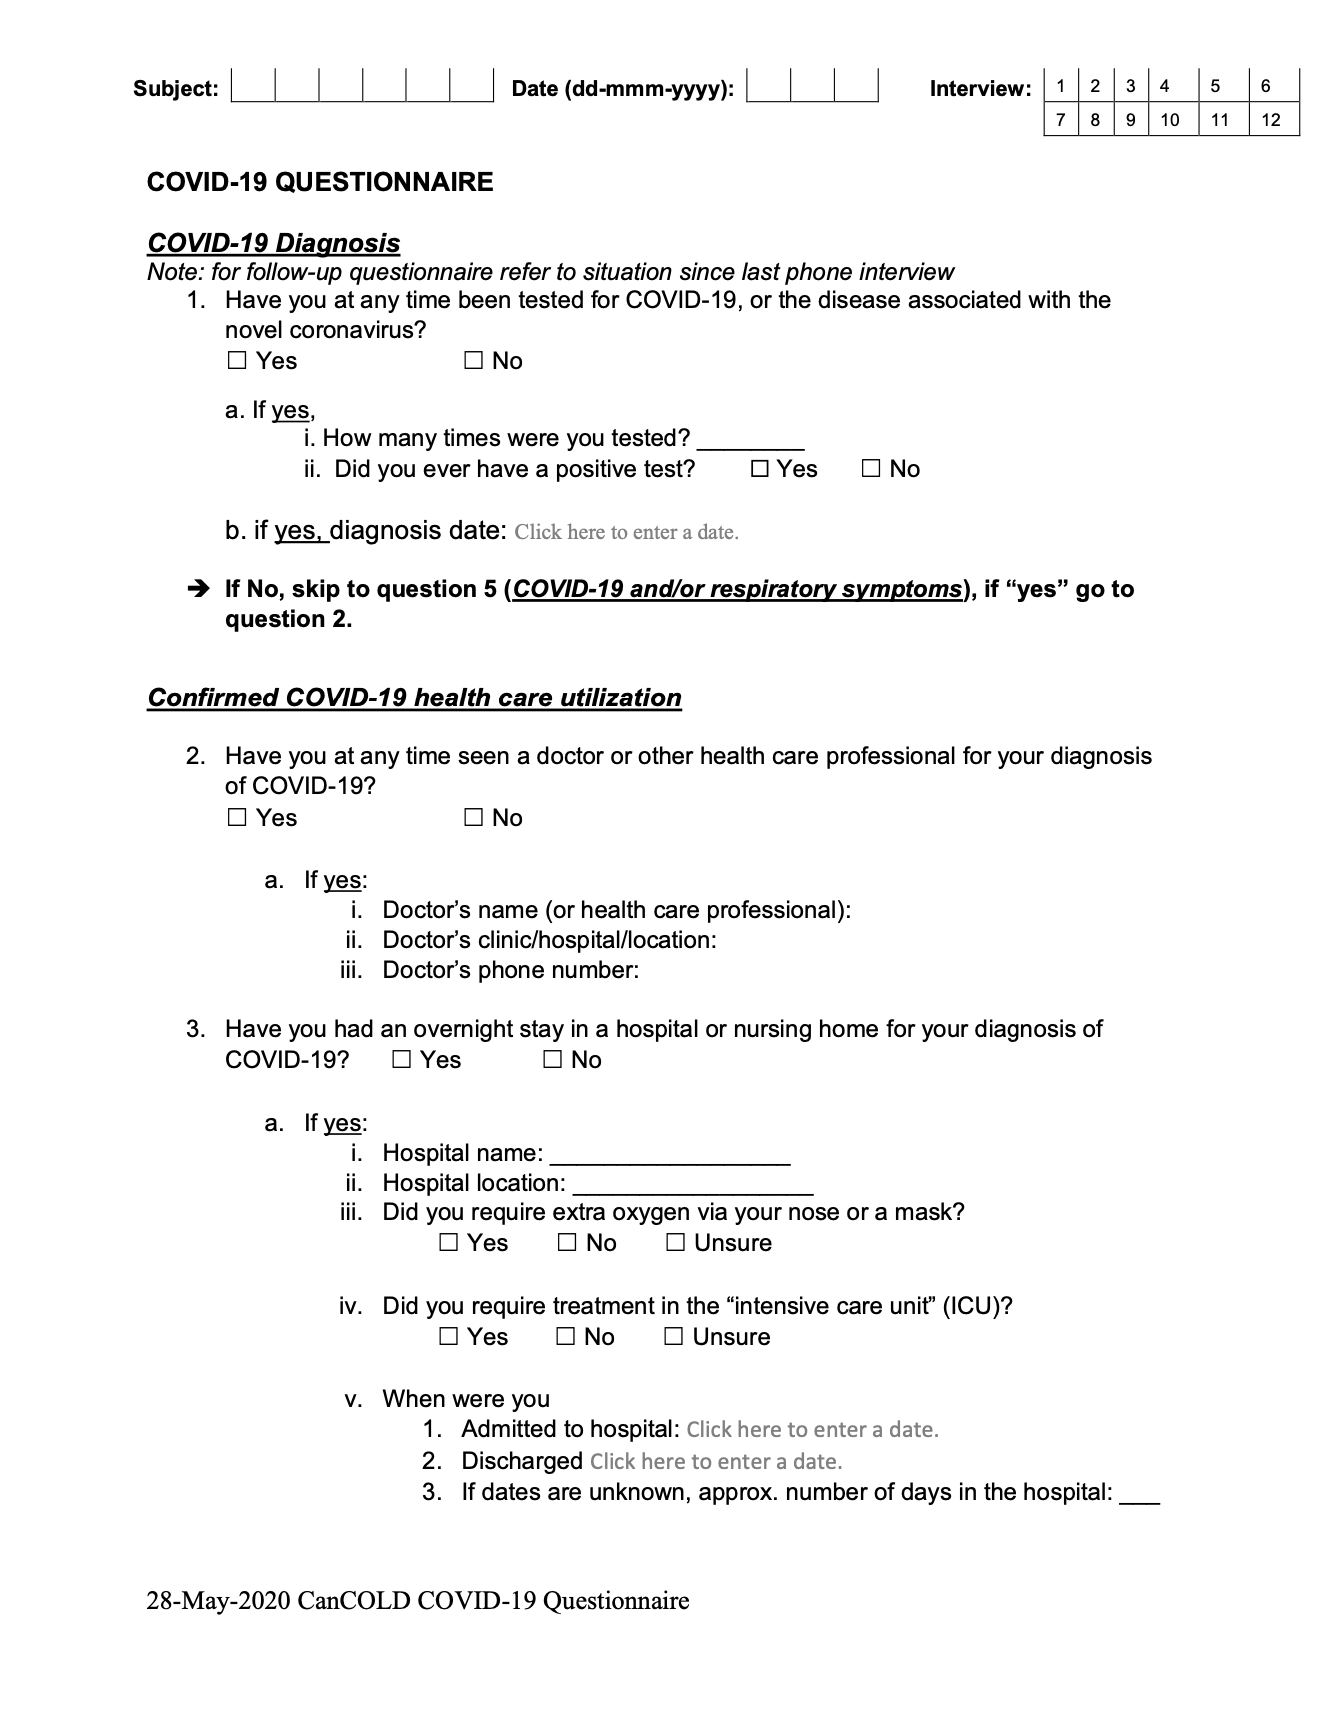
**

**
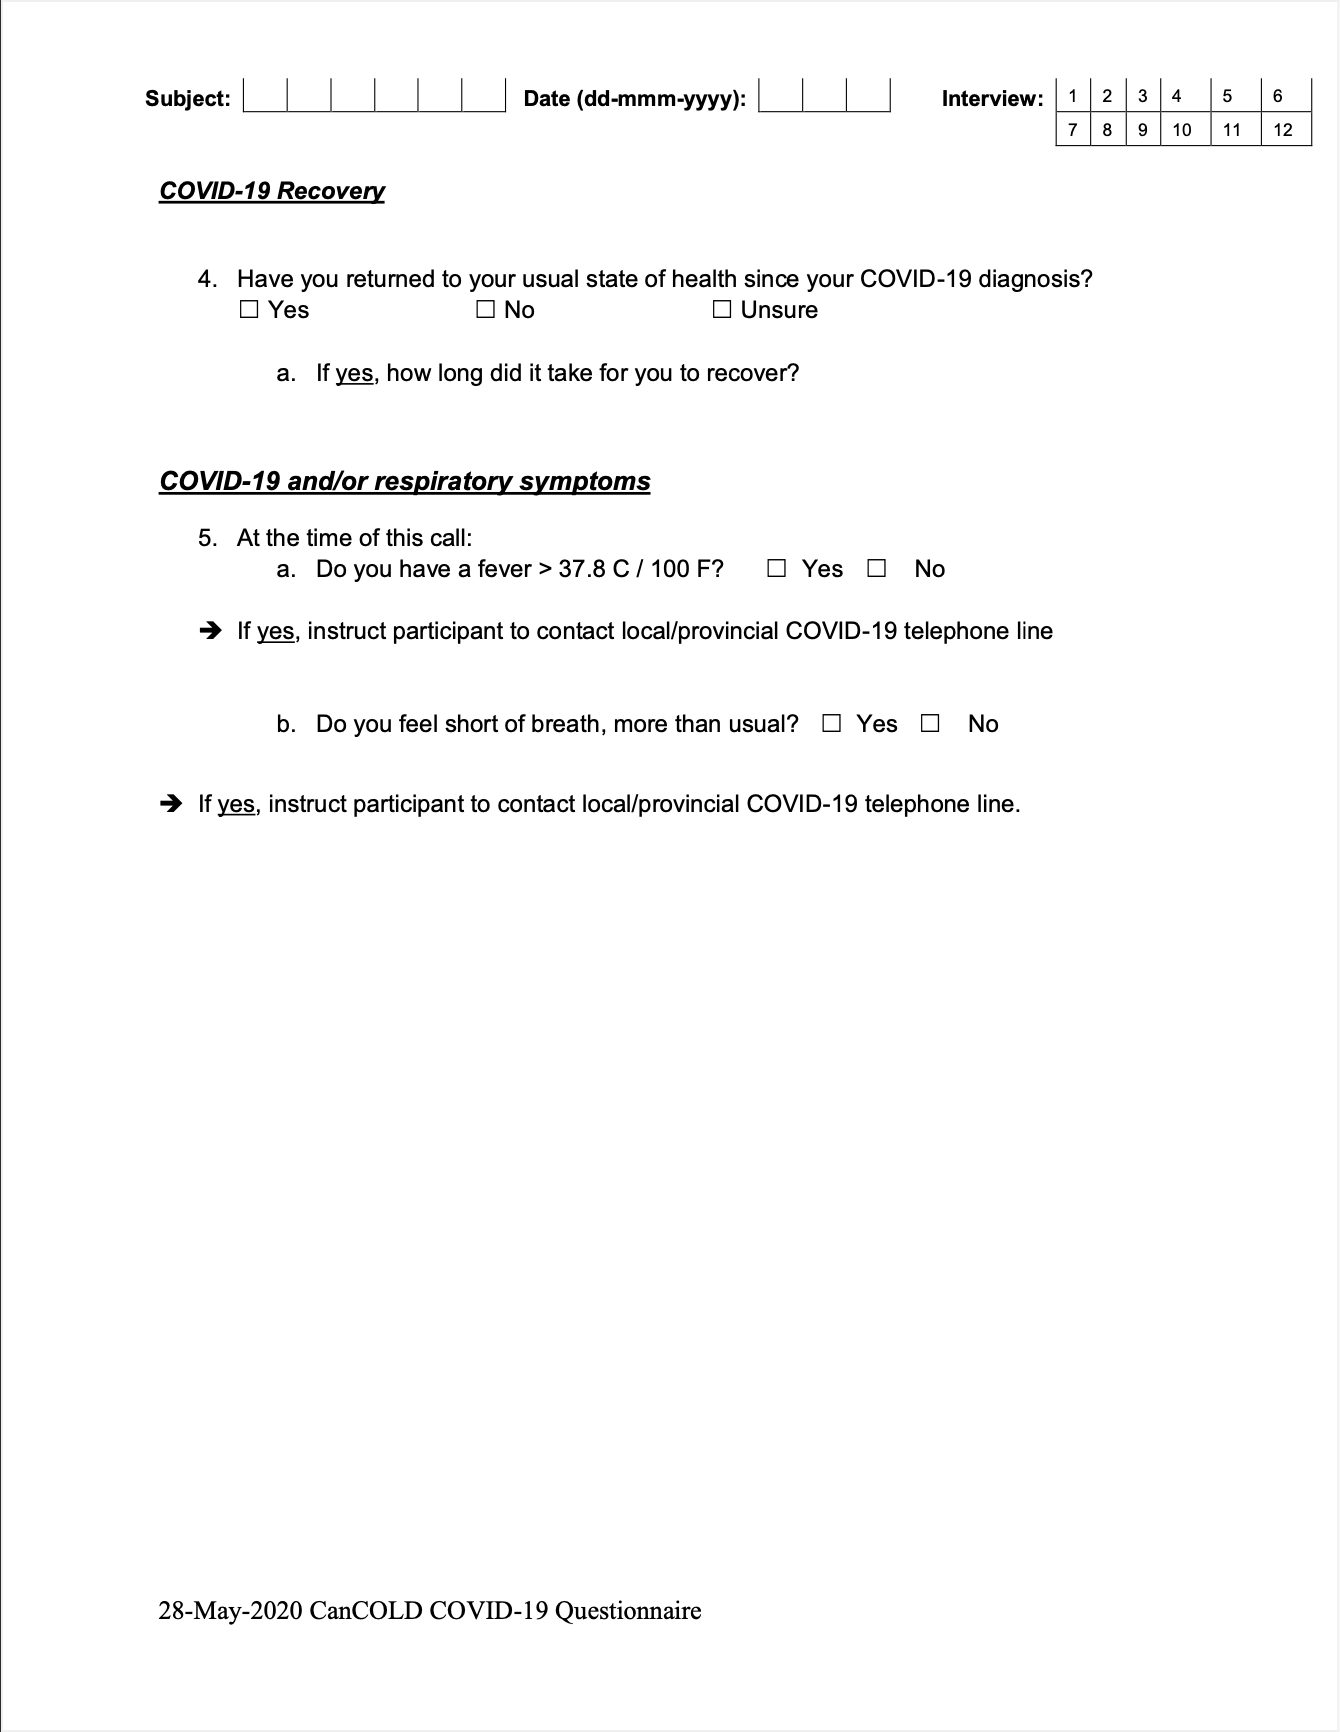
**

**
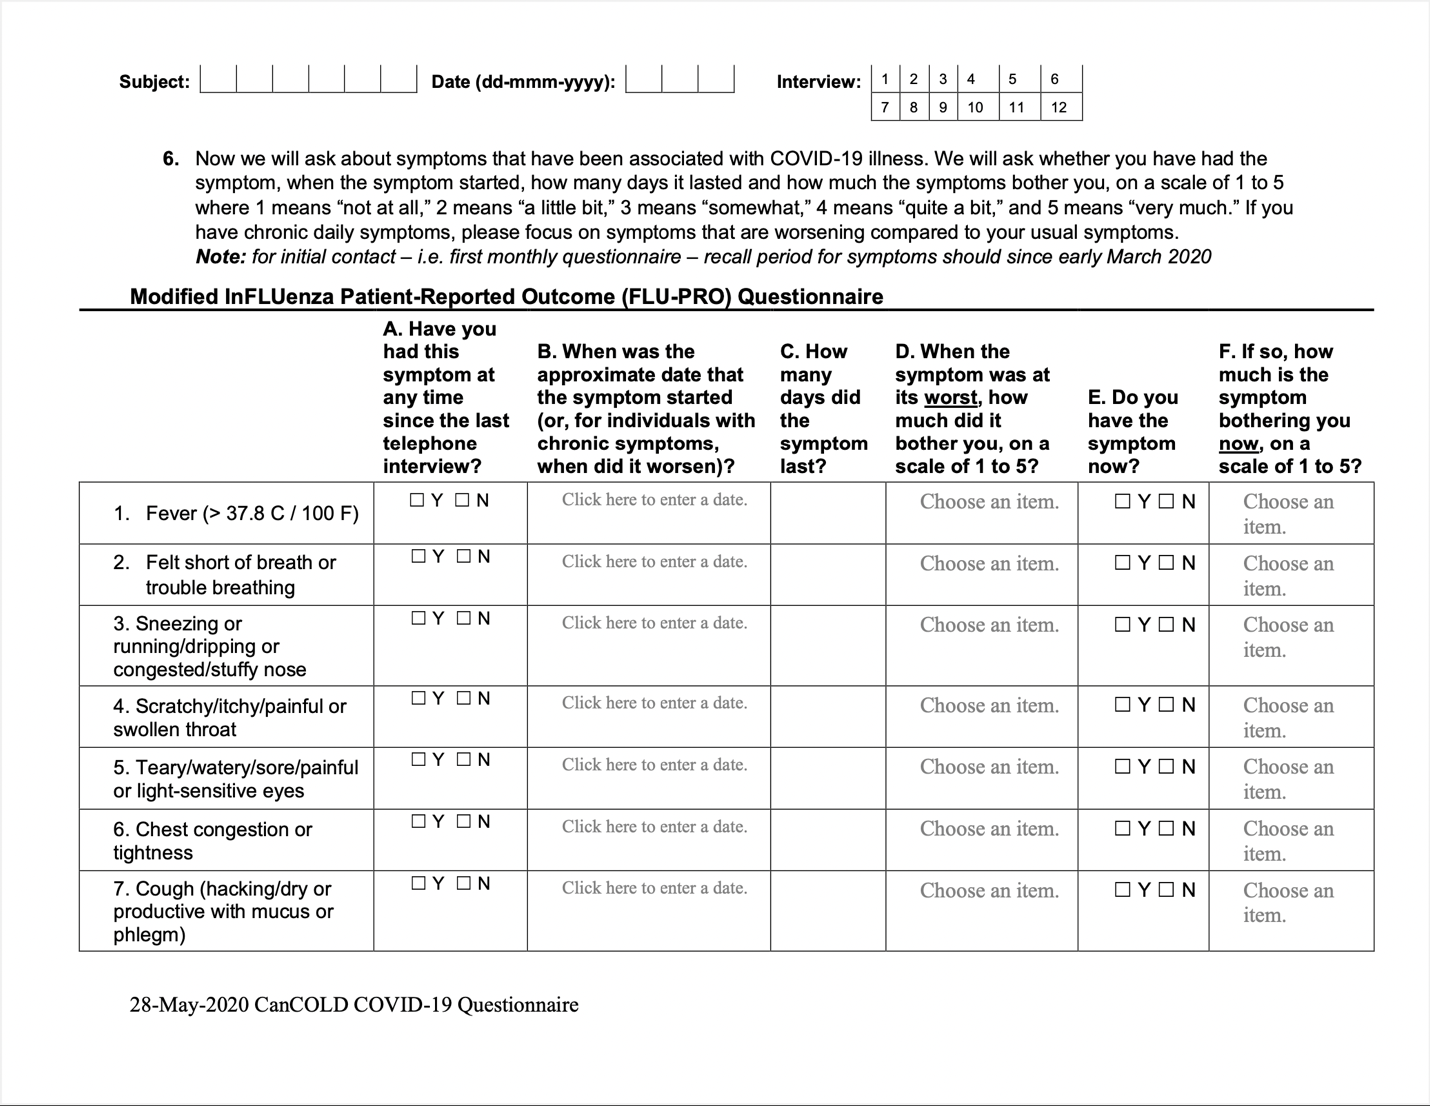
**

**
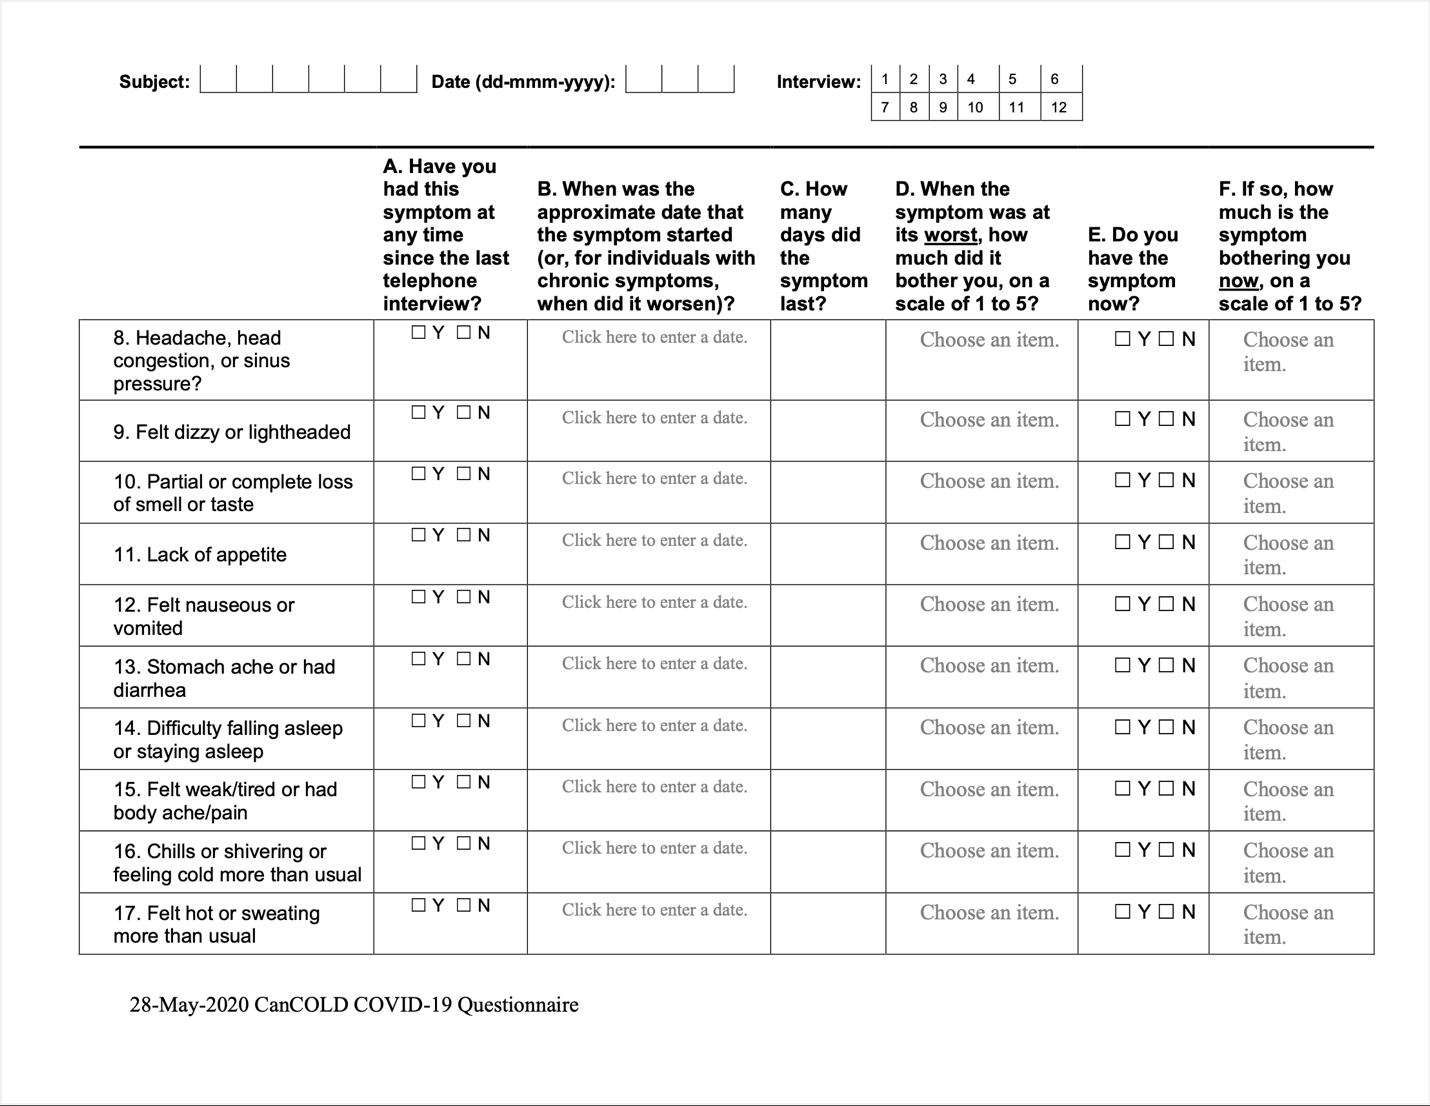
**

**
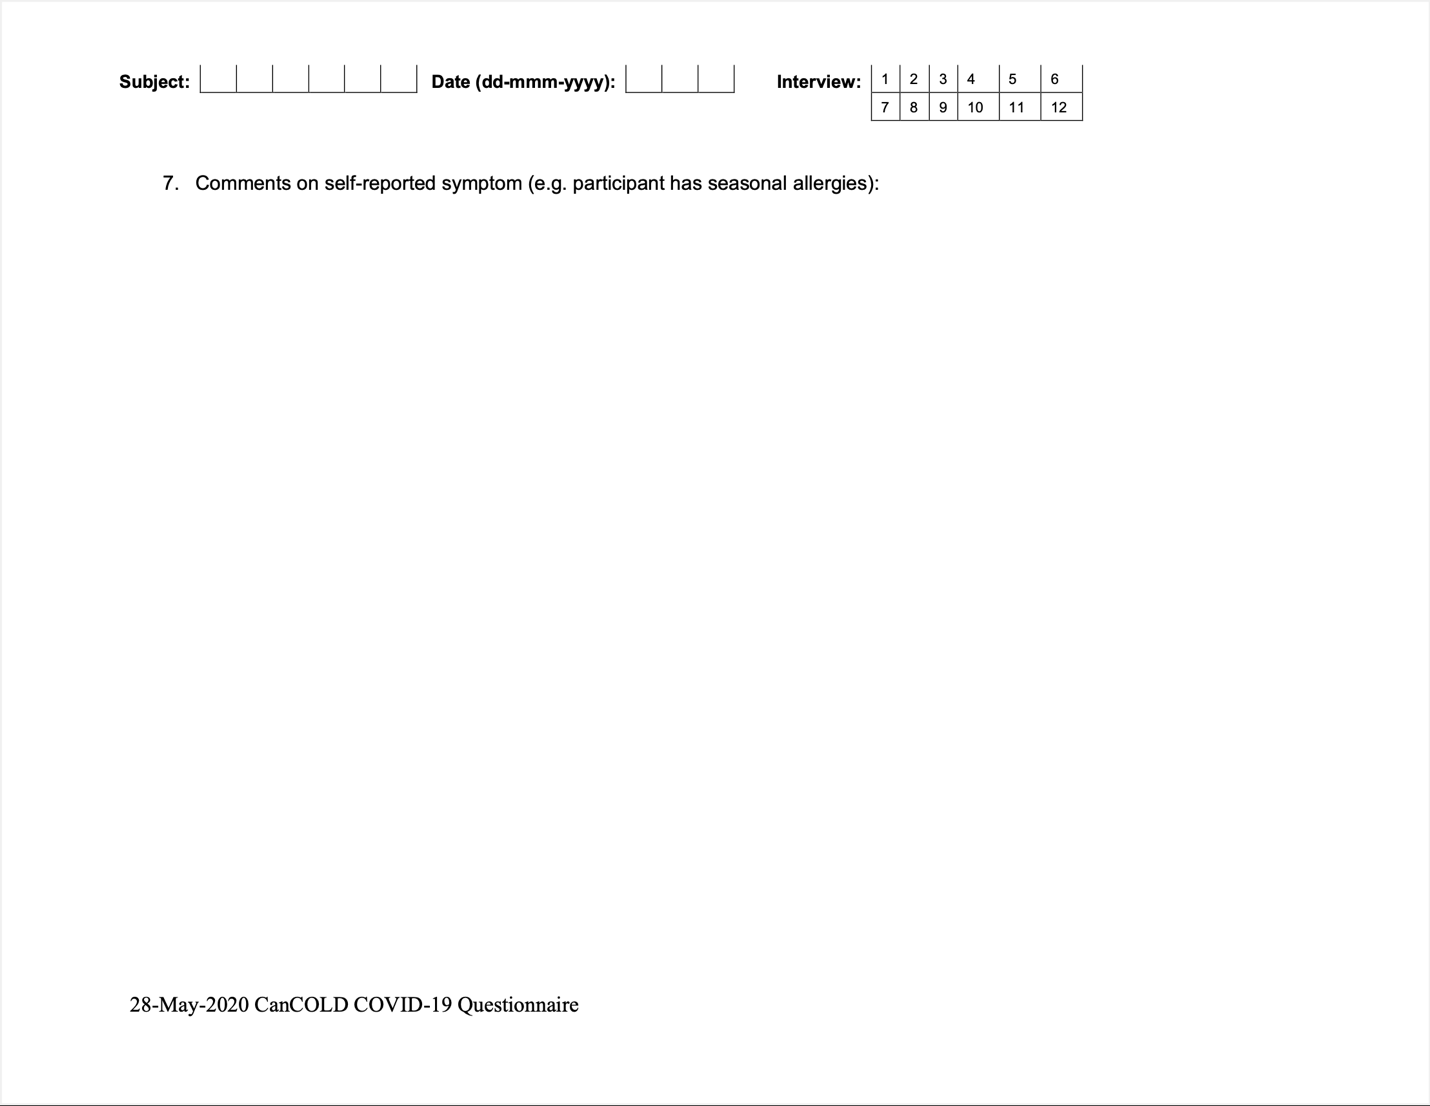
**

**
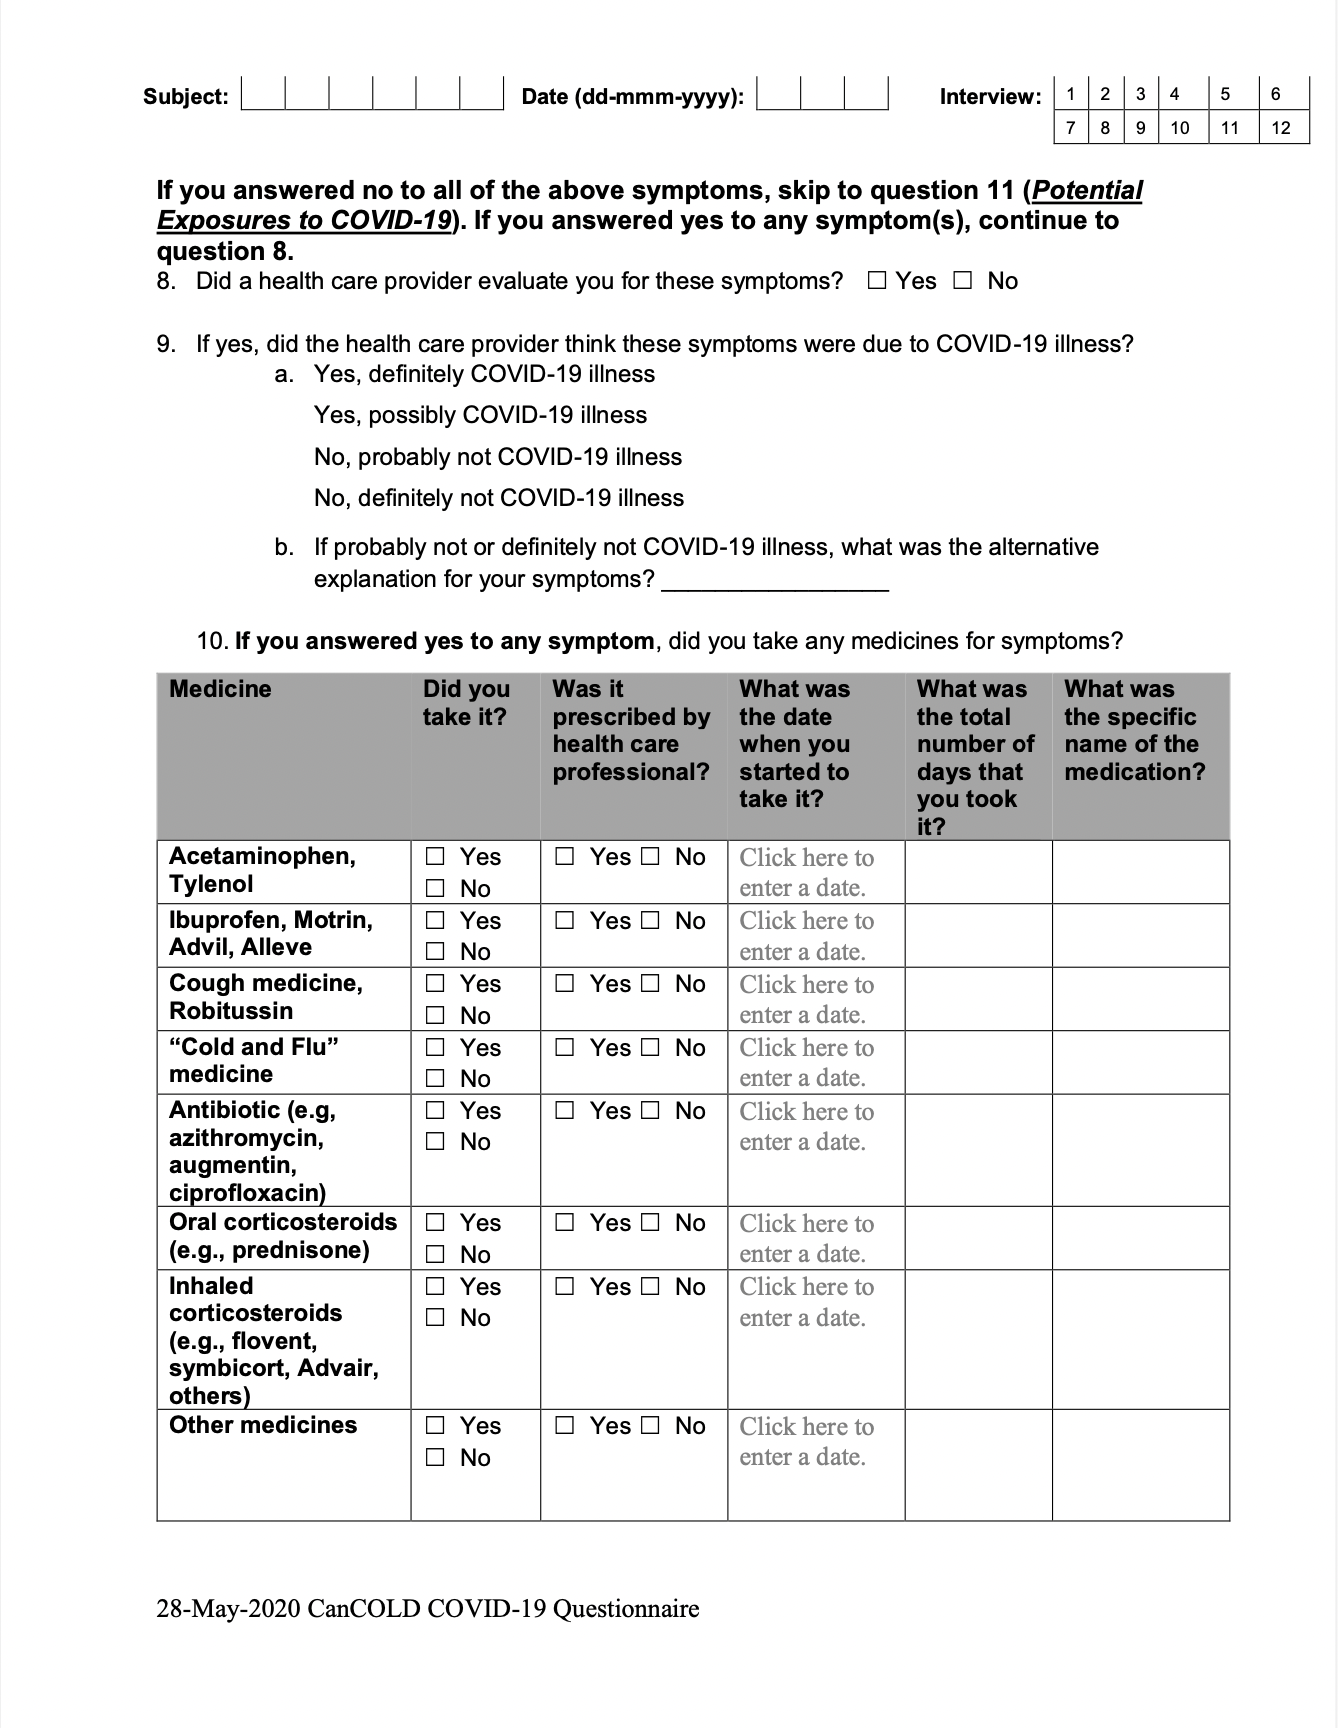
**

**
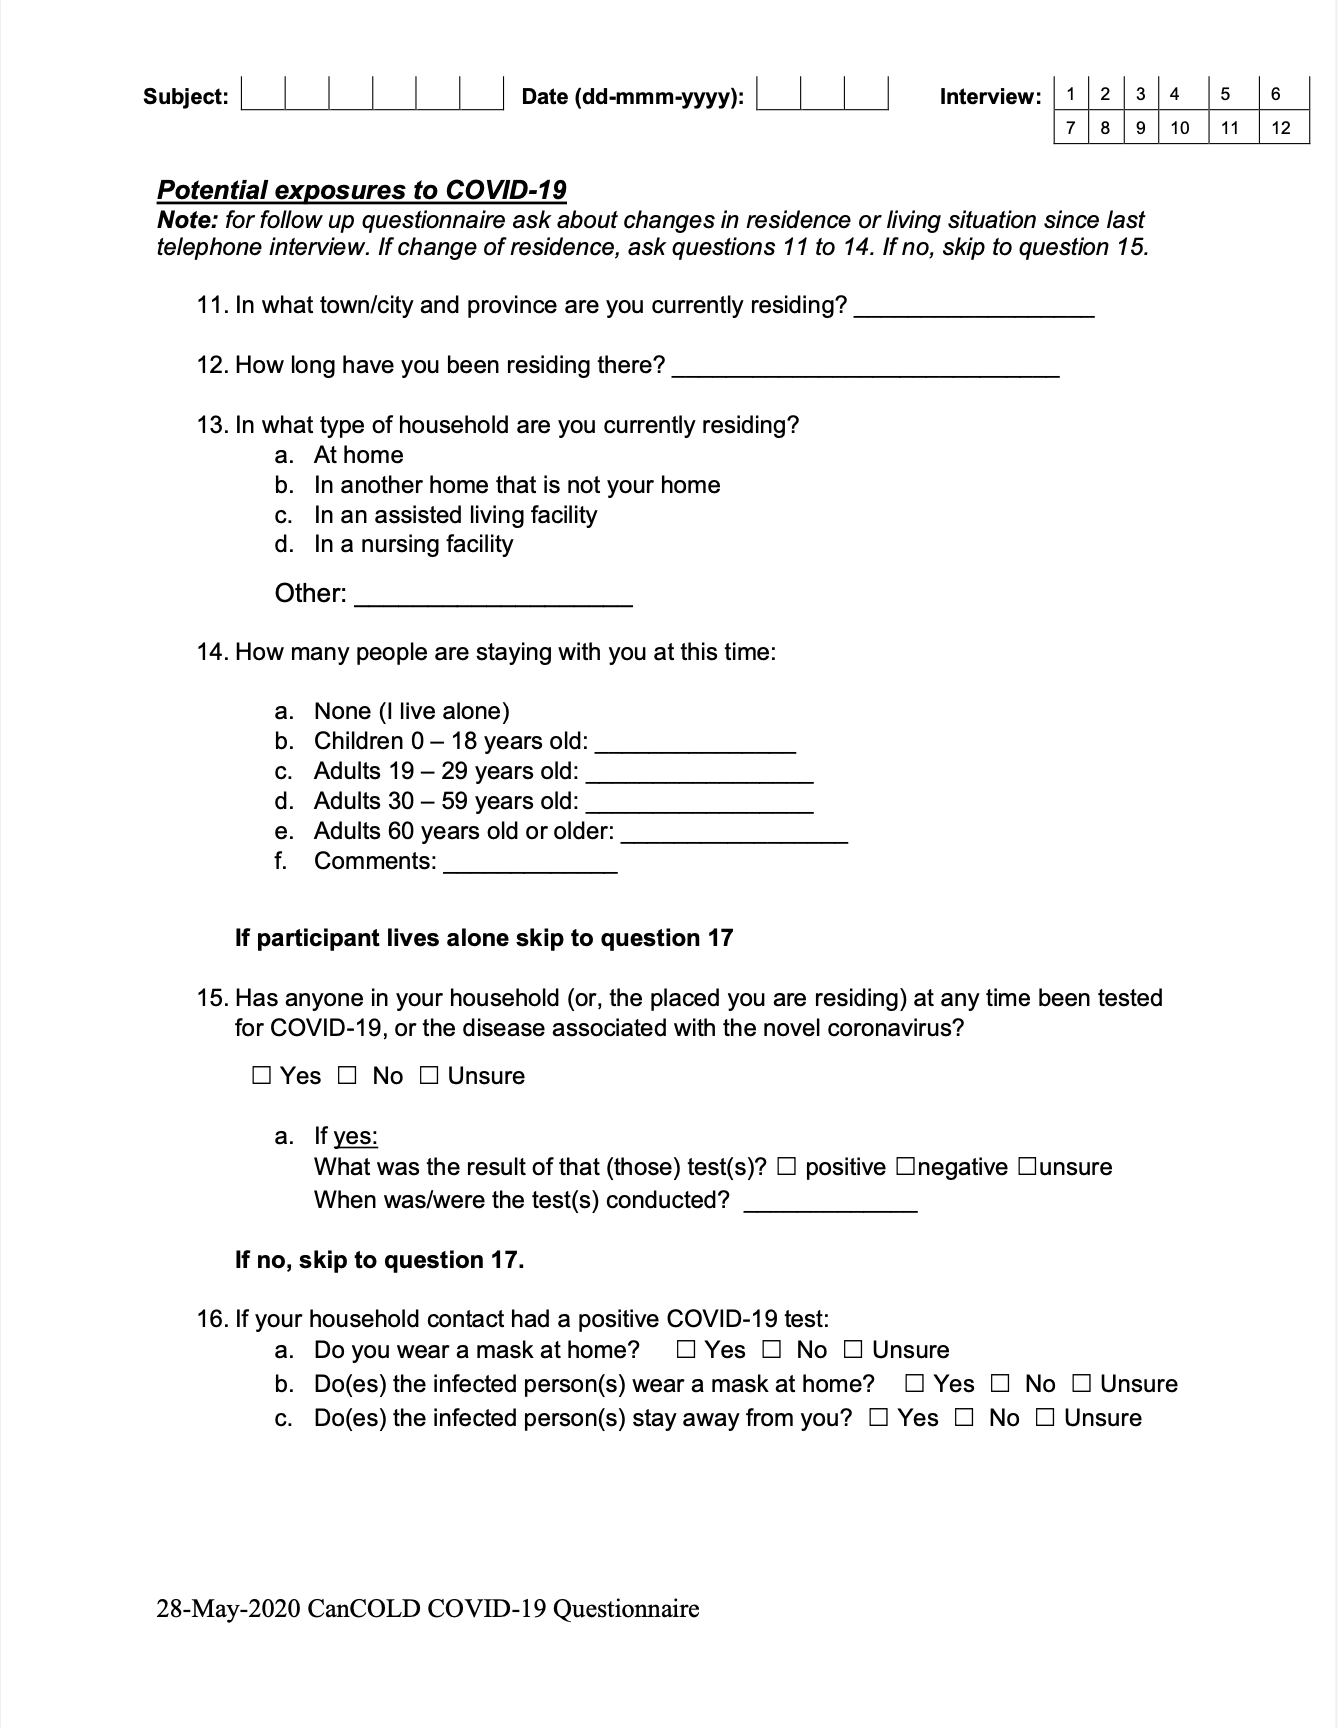
**

**
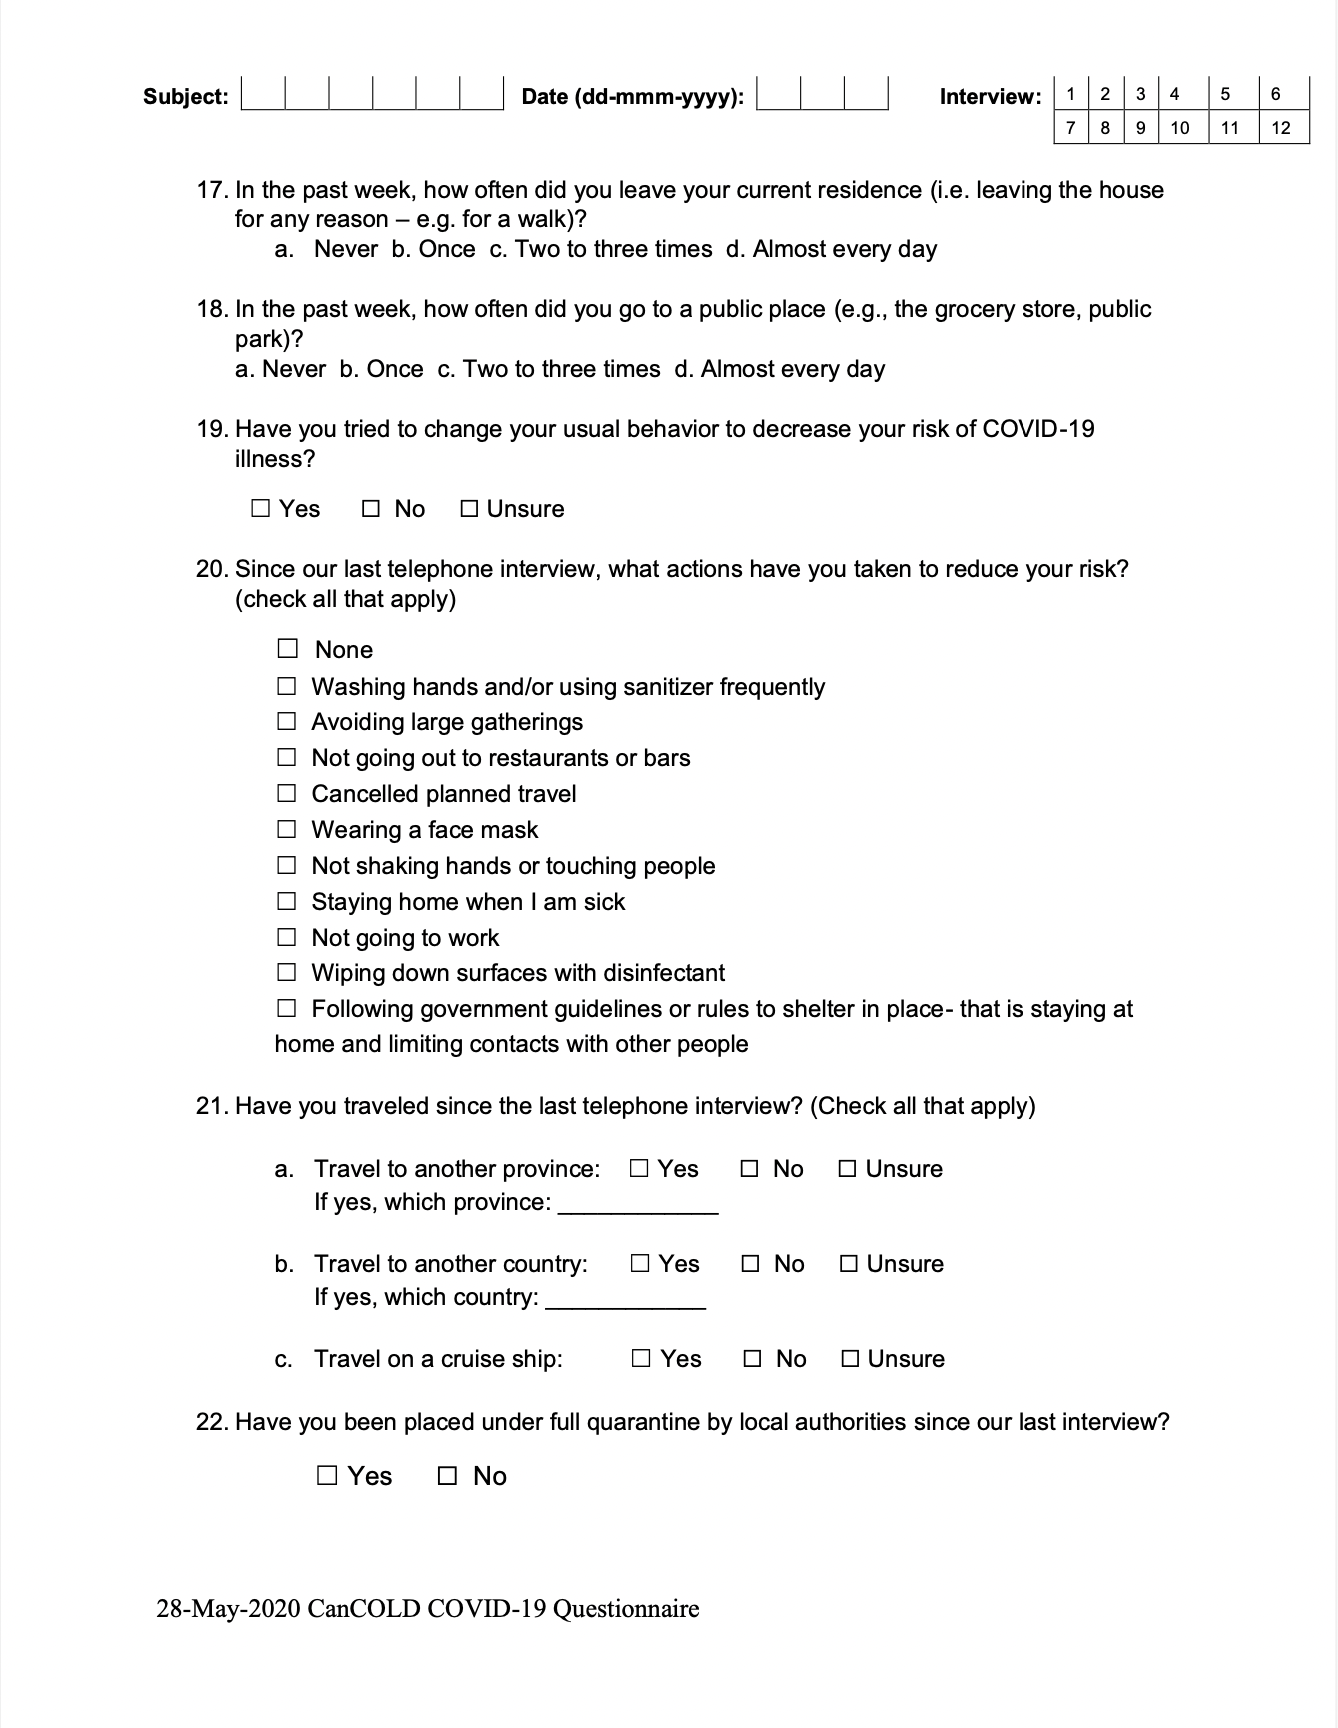
**

**
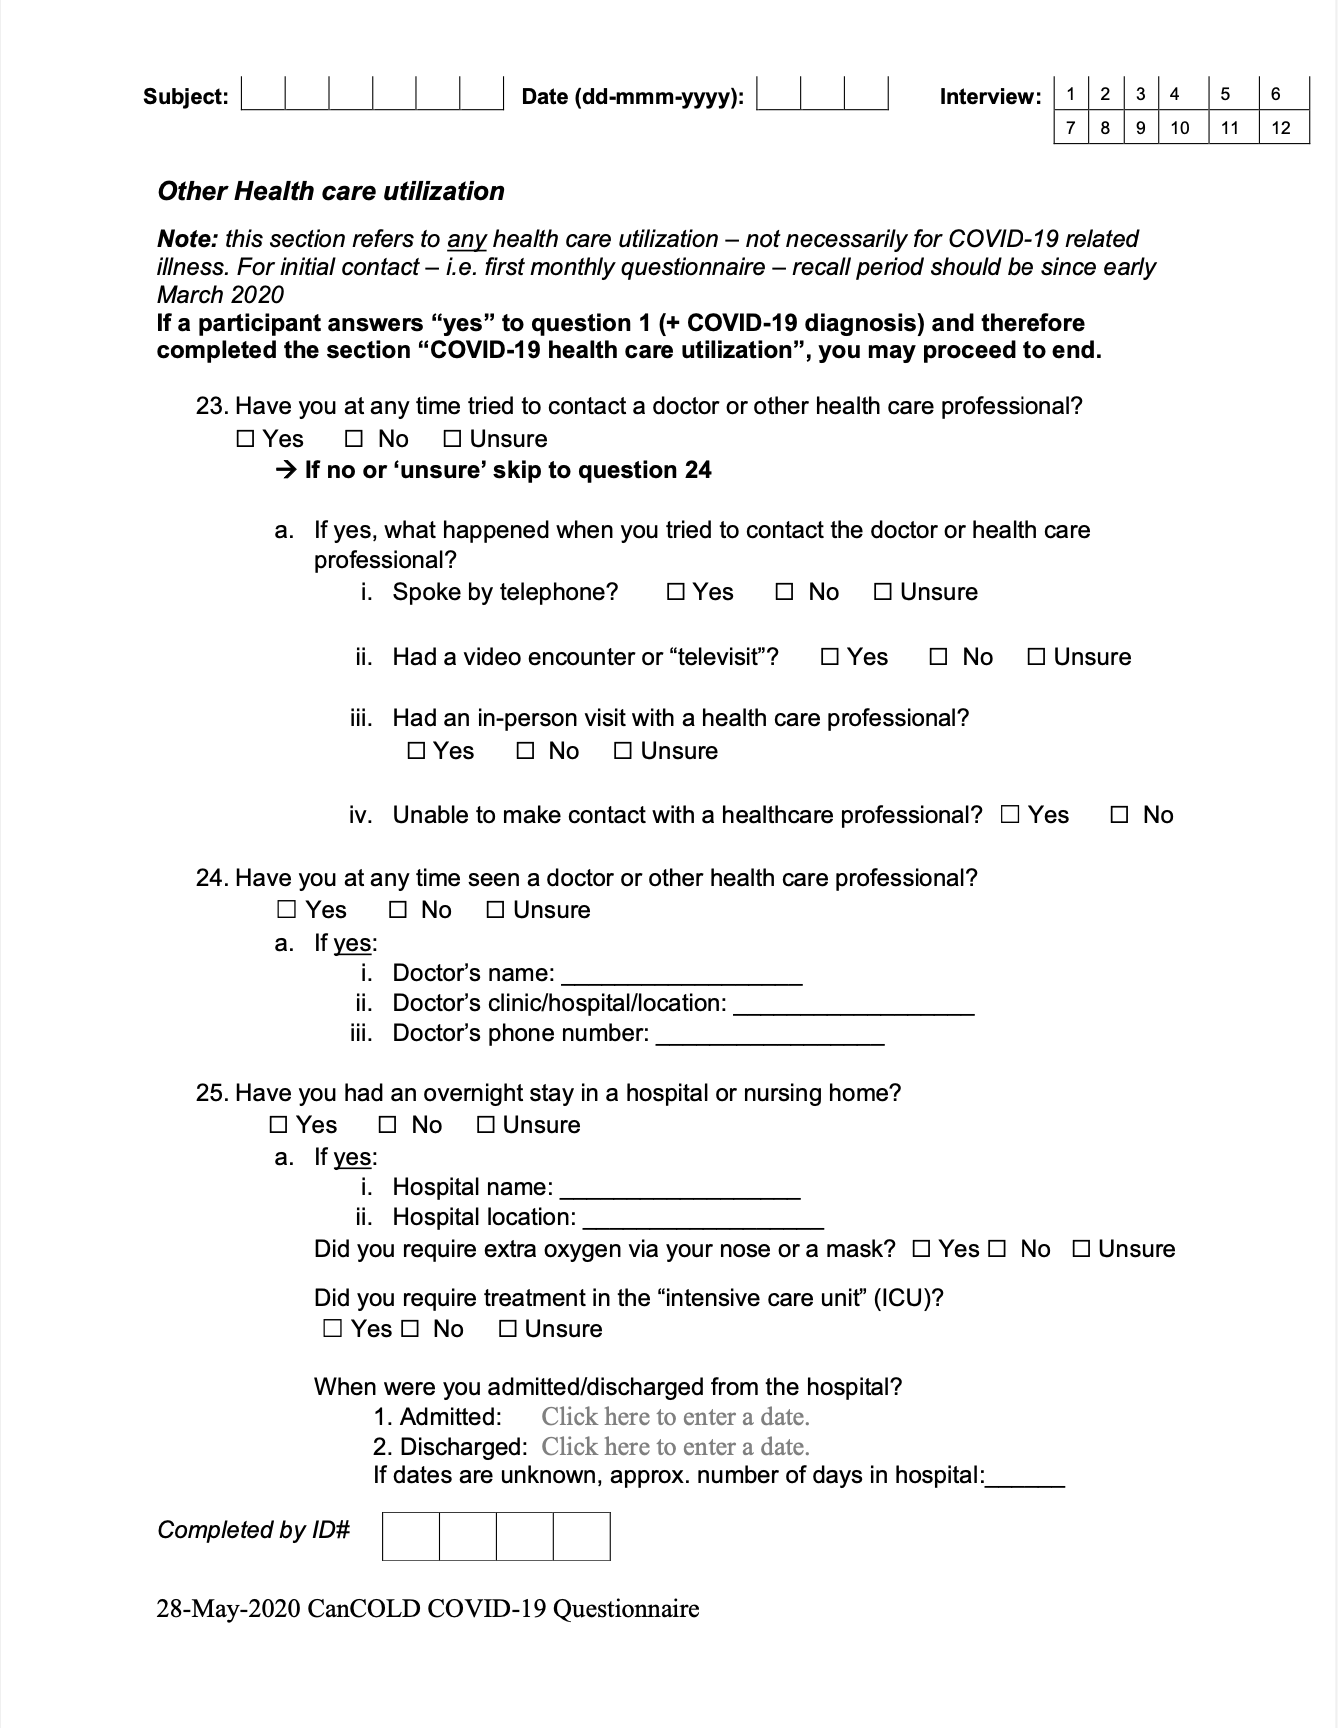
**
